# Supplementary material
Source: publisher figshare collection journal article supplement (https://acs.figshare.com/ndownloader/files/5276512)
Supplement: Supplementary file 1 [file 5276512]

# Supporting Information

## Doping Effect on Edge Terminated Ferromagnetic Graphene Nanoribbons

*Yeonsig Nam, Daeheum Cho, and Jin Yong Lee\**

Department of Chemistry, Sungkyunkwan University, Suwon 16419, Korea,

E-mail: [jinylee@skku.edu](mailto:jinylee@skku.edu)

### Table of Contents

**Figure S1.** Spin distribution patterns of (un)doped of **TZT** calculated with PBE0 functional.

**Table S1.** Electronic energy difference and magnetic moment of **TZT** calculated with PBE0 functional.

**Scheme S1.** Schematic diagram of Major coupling pathway, specific doping position and atoms in edge and radical for **TZT**, **OZO** and **TZO**.

**Table S2.** Electronic energy difference and magnetic moment of each doped **TZT**, **OZO**, and **TZO**

**Figure S2.** Comparison of magnetic ground state of BN-doped **TZT** depending on doping position.

**Table S3.** Electronic energy difference and magnetic moment of BN-doped **TZT** for different doping position.

**Table S4.** Atomic magnetization, bond length, dihedral angle, coupler length of **TZO** system.

**Figure S3.** Density of states diagram for undoped and doped **TZT** system.

**Figure S4.** Spin distribution patterns of doped and undoped **TZT** system at B and N doped geometry.

**Figure S5.** Density of states diagram for undoped and doped **OZO** system.

**Figure S6.** Density of states diagram for undoped and doped **TZO** system.

# PBE0

## TZT

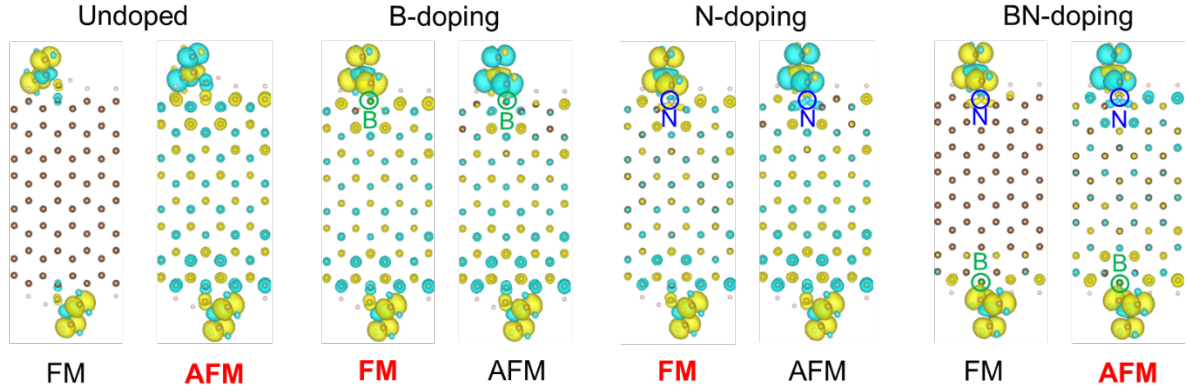

**Figure S1.** Spin distribution patterns of doped and undoped **TZT** system. Yellow and cyan colors represent up and down spin respectively. The B or N doping positions are marked in green or blue circle, respectively. More stable configurations were marked in red.

**Table S1.** Energy Differences between FM and AFM Configurations ( $\Delta E_{FM-AFM}$ , in meV), Net Magnetic Moment per Unit Cell ( $\mu_s$ , in  $\mu_B$ ) of **TZT** system. Calculated with PBE0 Functional.

|                     | undoped |       | B-doped |        | N-doped |        | BN-doped |       |
|---------------------|---------|-------|---------|--------|---------|--------|----------|-------|
|                     | FM      | AFM   | FM      | AFM    | FM      | AFM    | FM       | AFM   |
| $\Delta E_{FM-AFM}$ | 26.740  |       | -19.320 |        | -15.150 |        | 13.580   |       |
| $\mu_s (\mu_B)$     | 1.999   | 0.000 | 3.000   | -1.000 | 3.000   | -1.000 | 4.001    | 0.000 |

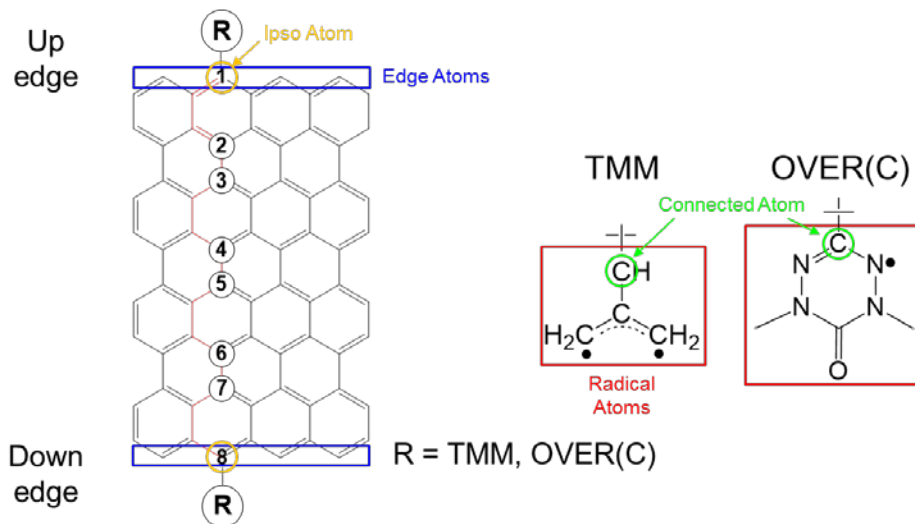

**Scheme S1.** Schematic diagram of major spin coupling pathway (red line), B- or N-doped position (1-8) for **TZT**, **OZO**, and **TZO**, and specific atom: ipso atom of edge and connected atom of radical.

**Table S2.** Calculated Electronic Energy Difference between FM and AFM Magnetic Configurations ( $\Delta E_{FM-AFM}$ , in meV), Net Magnetic Moment per Unit Cell ( $\mu_s$ , in  $\mu_B$ ) of B- and N-doped system along with major spin coupling pathway for **TZT**, **OZO**, and **TZO**. Calculated with PBE Functional.<sup>a</sup>

|                     | TZT              |        |        |        |        |        |        |        |
|---------------------|------------------|--------|--------|--------|--------|--------|--------|--------|
|                     | B-1 <sup>b</sup> | B-2    | B-3    | B-4    | N-1    | N-2    | N-3    | N-4    |
| $\Delta E_{FM-AFM}$ | -0.290           | -0.040 | -0.070 | -0.070 | -0.002 | -0.170 | -0.080 | -0.060 |
| $\mu_s$ (FM)        | 2.945            | 1.958  | 1.970  | 1.964  | 2.976  | 1.922  | 1.956  | 1.949  |
| $\mu_s$ (AFM)       | -0.982           | 0.006  | -0.035 | 0.008  | -1.011 | 0.031  | -0.016 | 0.012  |
|                     | OZO              |        |        |        |        |        |        |        |
|                     | B-1              | B-2    | B-3    | B-4    | N-1    | N-2    | N-3    | N-4    |
| $\Delta E_{FM-AFM}$ | -0.840           | -1.120 | -1.580 | -3.890 | -1.730 | -1.590 | -0.200 | -1.420 |
| $\mu_s$ (FM)        | 2.837            | 3.341  | 3.489  | 3.663  | 2.768  | 3.064  | 3.141  | 3.369  |
| $\mu_s$ (AFM)       | 0.897            | 0.486  | 0.410  | 0.091  | 0.991  | 0.598  | 0.490  | 0.0190 |
|                     | TZO-B            |        |        |        |        |        |        |        |
|                     | B-1              | B-2    | B-3    | B-4    | B-5    | B-6    | B-7    | B-8    |
| $\Delta E_{FM-AFM}$ | 1.140            | 0.340  | 0.840  | 0.400  | 0.700  | 0.320  | 0.340  | 0.250  |
| $\mu_s$ (FM)        | 3.786            | 2.812  | 2.898  | 2.728  | 2.812  | 2.509  | 2.404  | 1.945  |
| $\mu_s$ (AFM)       | -0.042           | 0.887  | 0.927  | 0.784  | 0.846  | 0.578  | 0.458  | -0.023 |
|                     | TZO-N            |        |        |        |        |        |        |        |
|                     | N-1              | N-2    | N-3    | N-4    | N-5    | N-6    | N-7    | N-8    |
| $\Delta E_{FM-AFM}$ | 0.550            | 0.310  | 0.570  | 0.330  | 0.410  | 0.050  | 0.220  | 1.050  |
| $\mu_s$ (FM)        | 3.831            | 2.757  | 2.812  | 2.651  | 2.635  | 2.291  | 2.190  | 1.855  |
| $\mu_s$ (AFM)       | -0.128           | 0.834  | 0.833  | 0.706  | 0.667  | 0.341  | 0.234  | -0.108 |

<sup>a</sup> Only 1-4 doping position was calculated for **TZT** and **OZO** system due to symmetry.

<sup>b</sup> B (or N)-n indicates B (or N) doping at n position depicted in Scheme S1.

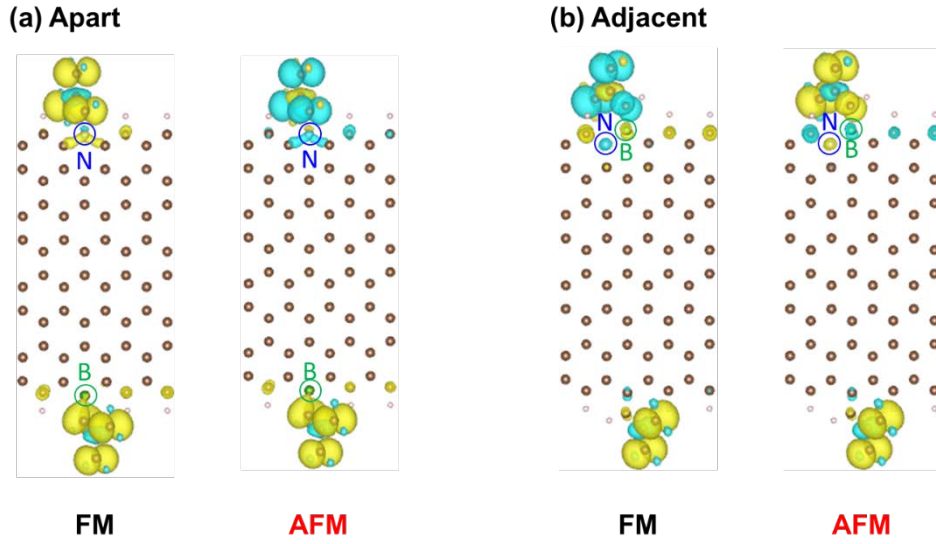

**Figure S2.** Comparison of magnetic ground state of BN-doped **TZT** system depending on the doping position of B and N atom. (a) B and N apart (b) B and N adjacent. Ground spin configuration were marked in red.

**Table S3.** Calculated Electronic Energy Difference between FM and AFM Magnetic Configurations ( $\Delta E_{FM-AFM}$  in meV), Net Magnetic Moment per Unit Cell ( $\mu_s$  in  $\mu_B$ ) of B- and N-Doped System for Doping Position. Calculated with PBE Functional

|                     | undoped |       | BN apart |       | BN adjacent |       |
|---------------------|---------|-------|----------|-------|-------------|-------|
|                     | FM      | AFM   | FM       | AFM   | FM          | AFM   |
| $\Delta E_{FM-AFM}$ | 0.330   |       | 0.280    |       | 0.800       |       |
| $\mu_s (\mu_B)$     | 1.964   | 0.001 | 3.951    | 0.040 | 2.082       | 0.116 |

**Table S4.** Atomic Magnetizations ( $\mu(X_i)$  where  $X = C, N, A,$  and  $B$  in  $0.0001\mu_B$ ) on radical ( $C_n$  or  $N_n$ ) and Edge Atoms ( $A_n$  or  $B_n$ ) Compared to Undoped System by Doping (Atom Magnetizations of Undoped System were Written in Brackets:  $[C_n, N_n]$ ) for TZO, Selected Bond Lengths ( $r1$ -  $r4$  and  $r1'$ -  $r4'$  in Å), Dihedral Angle between TMM Radical and Ipso Atom against ZGNR Coupler ( $\theta_1$  -  $\theta_4$  in  $^\circ$ ), and Coupler Length ( $d$ , in Å) between radicals. The Values for B-TMM/N-OVER and N-TMM/B-OVER Systems Represent Those for B/N and N/B Edge, Respectively.

|            | TZO         |             |             |             |             |                  |                  |
|------------|-------------|-------------|-------------|-------------|-------------|------------------|------------------|
|            | undoped     | B-TMM       | B-OVER      | N-TMM       | N-OVER      | B-TMM<br>/N-OVER | N-TMM<br>/B-OVER |
| $C_1(N_1)$ | 0 [175,160] | 4           | -16         | 36          | -28         | 37 (-28)         | 45 (-18)         |
| $C_2(N_2)$ | 0 [196,160] | 31          | -13         | 35          | -29         | 22 (-29)         | 35 (-11)         |
| $C_3(N_3)$ | 0 [48,103]  | 6           | -1          | 7           | -4          | 4 (-4)           | 9 (-2)           |
| $C_4(N_4)$ | 0 [9,103]   | 169         | 0           | 194         | -4          | 162 (-5)         | 204 (0)          |
| $A_1(B_1)$ | 0 [6,77]    | 7           | -76         | 5           | -75         | 13 (-73)         | 7 (-75)          |
| $A_2(B_2)$ | 0 [8,95]    | -3          | -94         | 7           | -93         | 12 (-93)         | 2 (-94)          |
| $A_3(B_3)$ | 0 [7,77]    | 9           | -75         | 5           | -75         | 17 (-73)         | 1 (-74)          |
| $A_4(B_4)$ | 0 [1,81]    | 6           | -79         | -4          | -78         | 13 (-75)         | 4 (-77)          |
| $r1(r1')$  | 1.36 (1.50) | 1.53 (1.50) | 1.36 (1.63) | 1.39 (1.50) | 1.36 (1.45) | 1.53 (1.45)      | 1.40 (1.62)      |
| $r2(r2')$  | 1.49 (1.35) | 1.44 (1.35) | 1.49 (1.35) | 1.43 (1.35) | 1.49 (1.34) | 1.45 (1.34)      | 1.43 (1.35)      |
| $r3(r3')$  | 1.40 (1.35) | 1.41 (1.35) | 1.40 (1.35) | 1.41 (1.35) | 1.40 (1.34) | 1.41 (1.34)      | 1.41 (1.35)      |
| $r4(r4')$  | 1.39 (1.35) | 1.41 (1.35) | 1.39 (1.36) | 1.40 (1.35) | 1.39 (1.36) | 1.41 (1.36)      | 1.41 (1.36)      |
| $\theta_1$ | 52.43       | 52.81       | 52.40       | 63.07       | 52.16       | 52.30            | 64.42            |
| $\theta_2$ | 11.05       | 7.86        | 10.89       | 8.91        | 10.98       | 9.10             | 7.62             |
| $\theta_3$ |             |             |             | $\sim 0$    |             |                  |                  |
| $\theta_4$ |             |             |             | $\sim 0$    |             |                  |                  |
| $d$        | 28.60       | 28.87       | 28.87       | 28.55       | 28.60       | 28.81            | 28.78            |

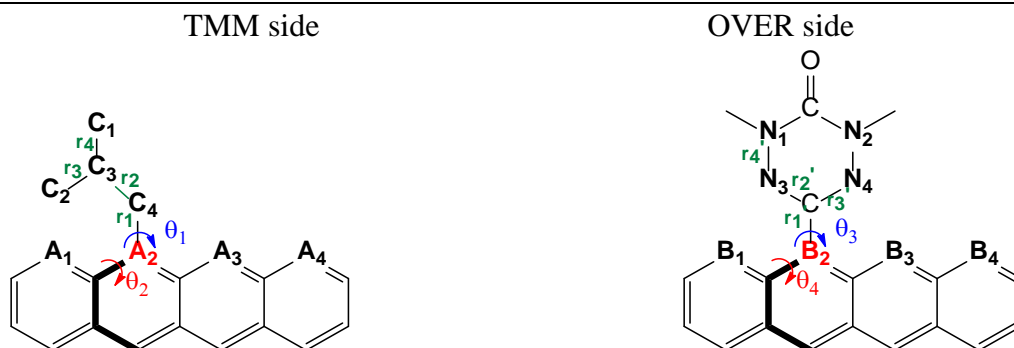

# TZT

(a) undoped

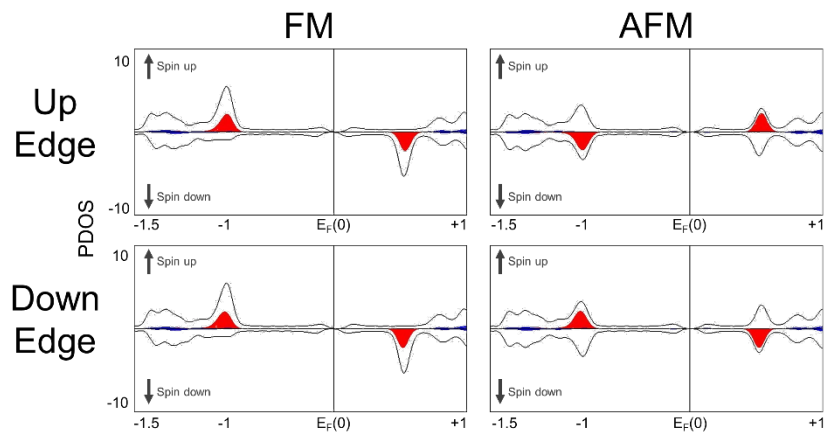

(c) N-doped

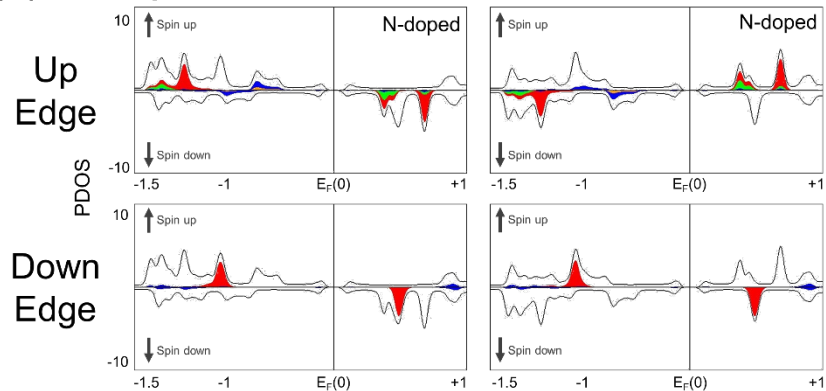

(b) B-doped

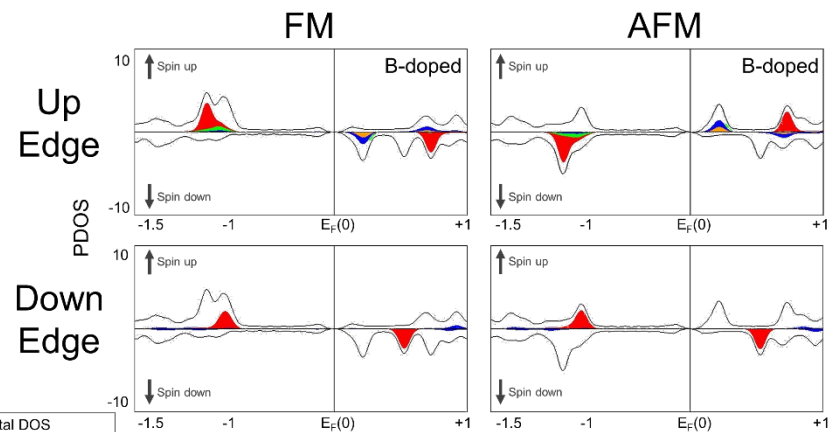

(d) BN-doped

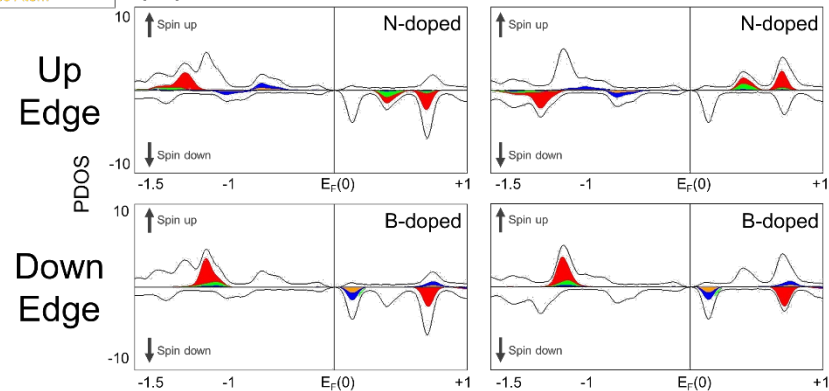

**Figure S3.** Density of States diagram for (a) undoped, (b) B-doped, (c) N-doped and (d) BN-doped TZT system. Each “Up edge” and “Down edge” includes both radical and edge atoms. Unfilled black line represents total DOS. Filled red, blue, green, and yellow represents DOS of total radical atoms, edge atoms, connected atom of radical, and ipso atom, respectively. (Scheme S1)

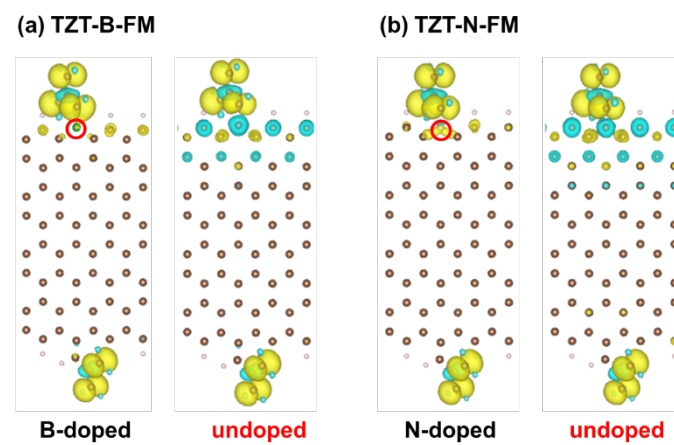

**Figure S4.** Spin distribution patterns of doped and undoped **TZT** system at B and N doped geometry obtained by PBE-vdW-DF calculations.

# OZO

(a) Undoped

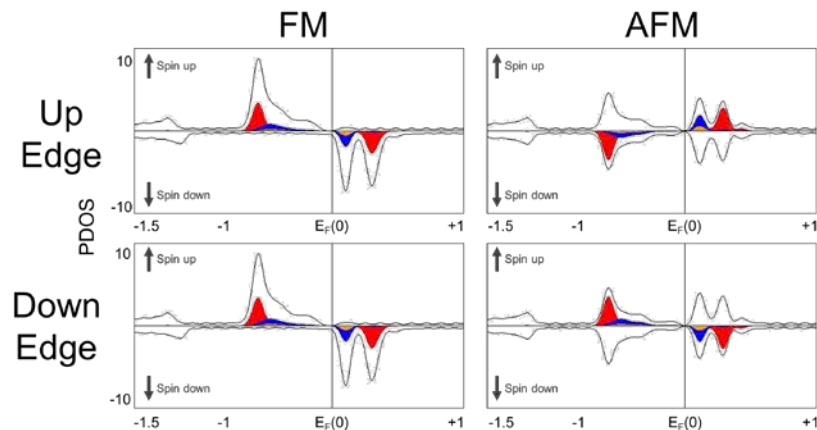

(b) B-doped

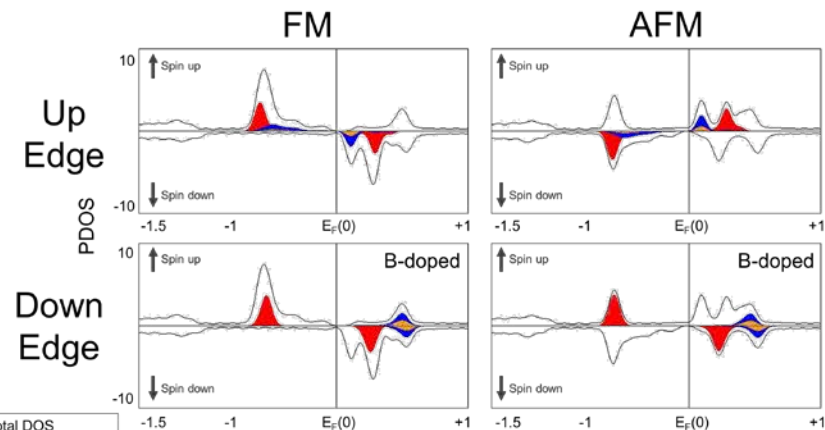

(c) N-doped

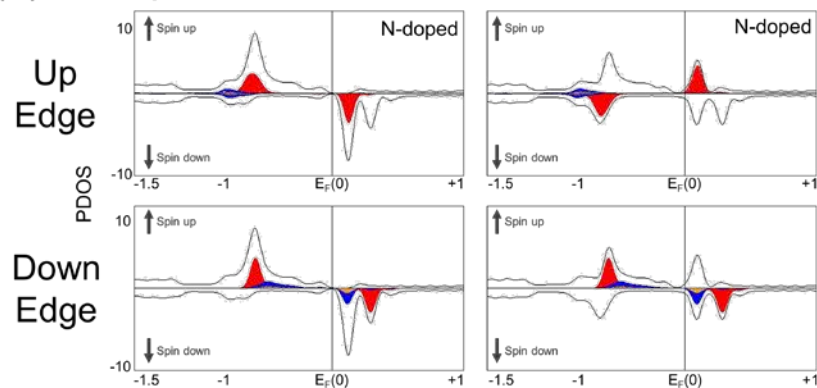

(d) BN-doped

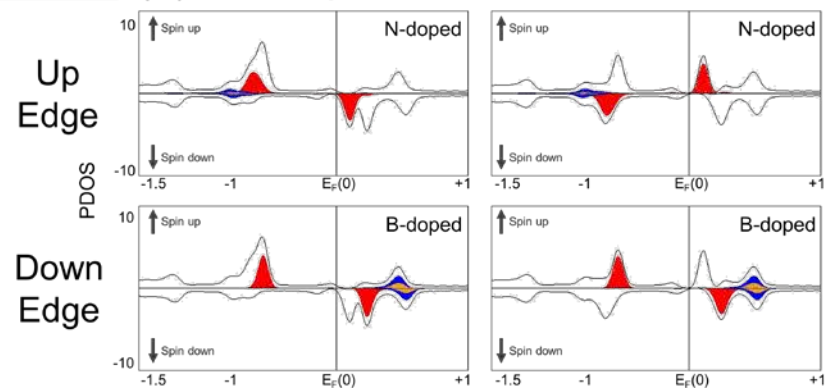

**Figure S5.** Density of States diagram for (a) undoped, (b) B-doped, (c) N-doped and (d) BN-doped **OZO** system. Each “Up edge” and “Down edge” includes both radical and edge atoms. Unfilled black line represents total DOS. Filled red, blue, green, and yellow represents DOS of total radical atoms, edge atoms, connected atom of radical, and ipso atom, respectively. (**Scheme S1**)



# TZO

(a) undoped

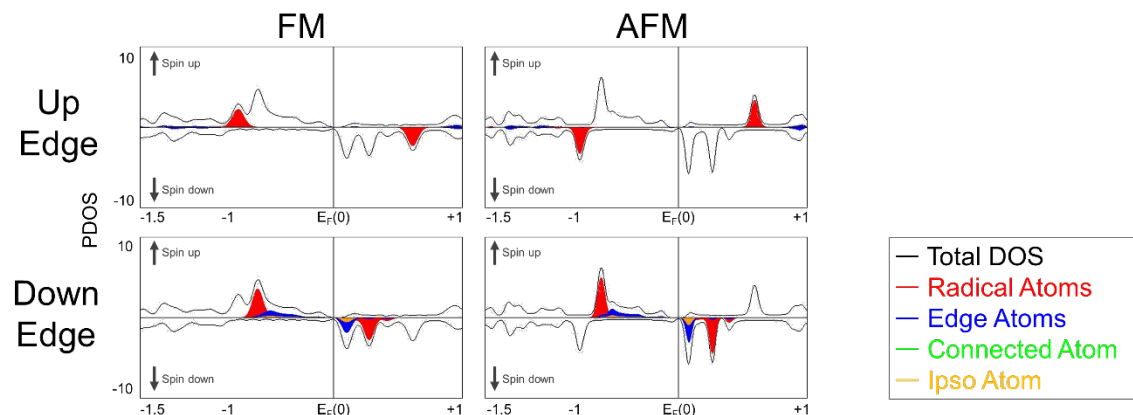

(b) B-TMM/N-OVER

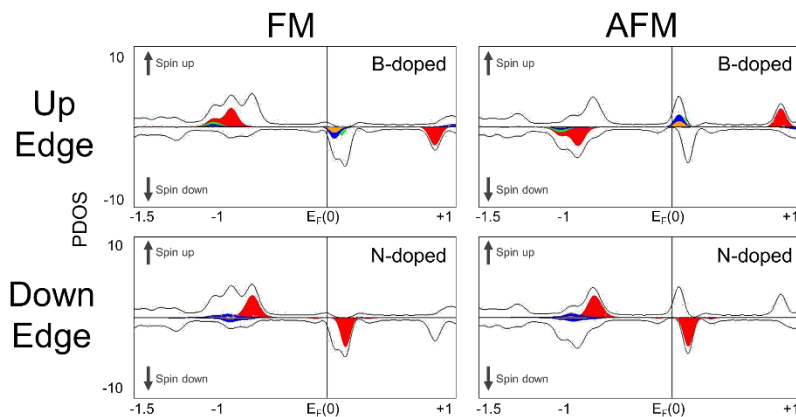

(c) N-TMM/B-OVER

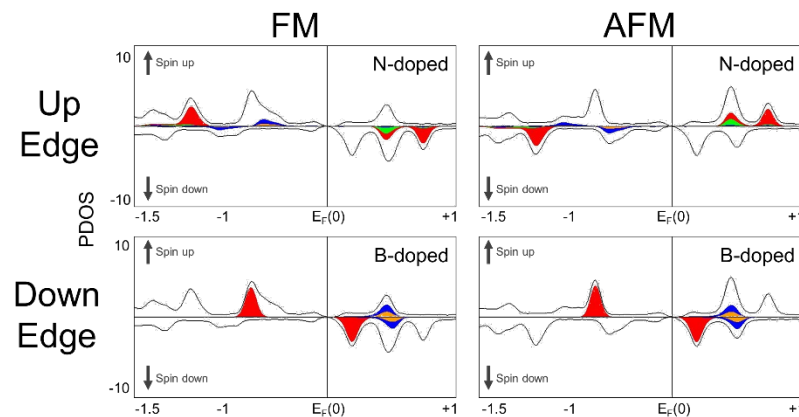

**Figure S6.** Density of States diagram for (a) undoped, (b) B-TMM/N-OVER, (c) N-TMM/B-OVER, (d) B-TMM, (e) B-OVER, (f) N-TMM, and (g) N-OVER TZO system. Each “Up edge” and “Down edge” includes both radical and edge atoms. Unfilled black line represents total DOS. Filled red, blue, green, and yellow represents DOS of total radical atoms, edge atoms, connected atom of radical, and ipso atom, respectively. (Scheme S1)

(d) B-TMM

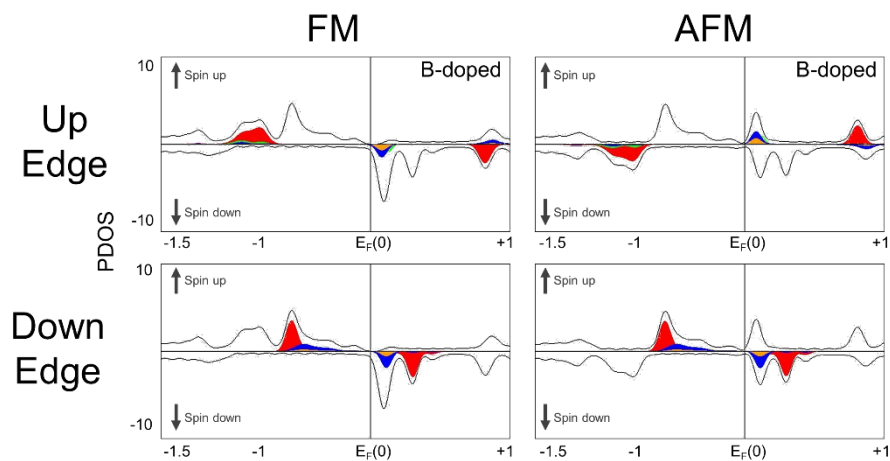

(e) B-OVER

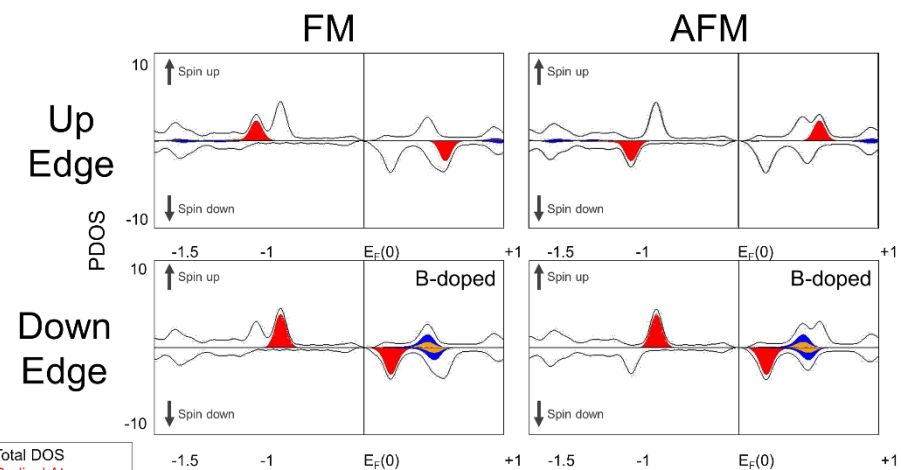

(f) N-TMM

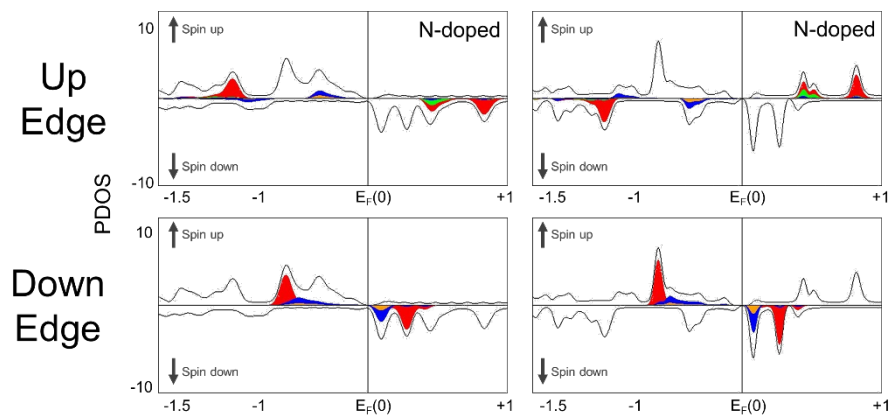

(g) N-OVER

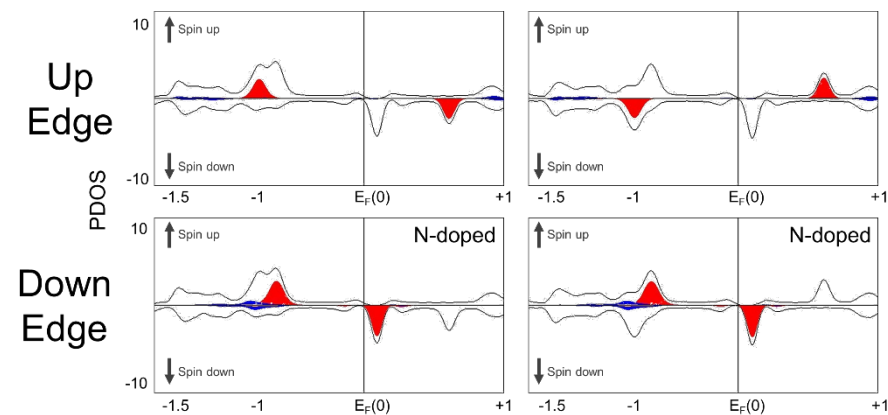

Figure S6. (Continued)
